# Supplementary material for: Bat Flies of the Family Streblidae (Diptera: Hippoboscoidea) Host Relatives of Medically and Agriculturally Important “Bat-Associated” Viruses
Source: MDPI journal article supplement (doi:10.3390/v13050860), 2021-05-08
Supplement: s1 [file s1]

**Table S1.** Classification of streblid bat flies based on mitochondrial cytochrome oxidase subunit I DNA sequences

| ID    | Country | Site               | Host bat species                | Accession       | Closest match (accession) <sup>1</sup>           | % identity <sup>2</sup> |
|-------|---------|--------------------|---------------------------------|-----------------|--------------------------------------------------|-------------------------|
| JAL01 | México  | Las Joyas          | <i>Pteronotus parnellii</i>     | MW792194        | <i>Trichobius sparsus</i> (MH282325.1)           | 97.64                   |
| JAL02 | México  | Las Joyas          | <i>Myotis thysanodes</i>        | nd <sup>3</sup> | nd <sup>3</sup>                                  | nd <sup>3</sup>         |
| JAL03 | México  | Jalocote           | <i>Artibeus jamaicensis</i>     | MW792195        | <i>Megistopoda aranea</i> (MH282060.1)           | 99.21                   |
| JAL04 | México  | Jalocote           | <i>Artibeus jamaicensis</i>     | MW792196        | <i>Megistopoda aranea</i> (MH282060.1)           | 99.21                   |
| JAL05 | México  | Jalocote           | <i>Artibeus lituratus</i>       | MW792197        | <i>Megistopoda aranea</i> (MH282060.1)           | 99.21                   |
| JAL06 | México  | Jalocote           | <i>Artibeus jamaicensis</i>     | MW792198        | <i>Aspidoptera phyllostomatis</i> (MH282004.1)   | 99.69                   |
| JAL07 | México  | Villa Purificación | <i>Pteronotus parnellii</i>     | MW792199        | <i>Trichobius yunkerii</i> (MH282371.1)          | 99.84                   |
| JAL08 | México  | Villa Purificación | <i>Pteronotus parnellii</i>     | MW792200        | <i>Trichobius yunkerii</i> (MH282369.1)          | 100                     |
| JAL09 | México  | Villa Purificación | <i>Sturnira lilium</i>          | MW792201        | <i>Aspidoptera phyllostomatis</i> (MH282004.1)   | 97.48                   |
| JAL10 | México  | Villa Purificación | <i>Glossophaga commissarisi</i> | MW792202        | <i>Trichobius uniformis</i> (MH282328.1)         | 97.64                   |
| JAL11 | México  | Villa Purificación | <i>Dermanura watsoni</i>        | MW792203        | <i>Trichobioides perspicillatus</i> (MH282206.1) | 80.82                   |
| JAL12 | México  | Las Joyas          | <i>Sturnia ludovici</i>         | nd <sup>3</sup> | nd <sup>3</sup>                                  | nd <sup>3</sup>         |
| NGO01 | Uganda  | Ngogo              | <i>Hipposideros ruber</i>       | MW792204        | <i>Nycterophilia parnelli</i> (KY882260.1)       | 86.99                   |
| NGO02 | Uganda  | Ngogo              | <i>Hipposideros ruber</i>       | MW792205        | <i>Nycterophilia parnelli</i> (MH282091.1)       | 86.30                   |
| NGO03 | Uganda  | Ngogo              | <i>Hipposideros ruber</i>       | MW792206        | <i>Nycterophilia parnelli</i> (MH282091.1)       | 86.30                   |
| NGO04 | Uganda  | Ngogo              | <i>Hipposideros ruber</i>       | MW792207        | <i>Nycterophilia parnelli</i> (MH282091.1)       | 86.93                   |
| NGO05 | Uganda  | Ngogo              | <i>Hipposideros ruber</i>       | MW792208        | <i>Nycterophilia parnelli</i> (MH282091.1)       | 86.30                   |
| NGO06 | Uganda  | Ngogo              | <i>Hipposideros ruber</i>       | MW792209        | <i>Nycterophilia parnelli</i> (MH282091.1)       | 86.30                   |
| NGO07 | Uganda  | Ngogo              | <i>Hipposideros ruber</i>       | MW792210        | <i>Nycterophilia parnelli</i> (MH282091.1)       | 85.85                   |
| NGO08 | Uganda  | Ngogo              | <i>Hipposideros ruber</i>       | MW792211        | <i>Nycterophilia parnelli</i> (KY882260.1)       | 86.99                   |
| NGO09 | Uganda  | Ngogo              | <i>Hipposideros ruber</i>       | MW792212        | <i>Nycterophilia parnelli</i> (MH282091.1)       | 85.98                   |
| NGO10 | Uganda  | Ngogo              | <i>Hipposideros ruber</i>       | MW792213        | <i>Nycterophilia parnelli</i> (MH282091.1)       | 86.30                   |
| NGO11 | Uganda  | Ngogo              | <i>Hipposideros ruber</i>       | MW792214        | <i>Nycterophilia parnelli</i> (MH282091.1)       | 86.30                   |
| NGO12 | Uganda  | Ngogo              | <i>Hipposideros ruber</i>       | MW792215        | <i>Nycterophilia parnelli</i> (MH282091.1)       | 86.30                   |

<sup>1</sup> Closest match to members of the family *Streblidae* in the GenBank nucleotide database identified using the blastn homology searching algorithm

<sup>2</sup> Percent nucleotide identity to the closest match in GenBank

<sup>3</sup> nd = not determined
